# Supplementary material
Source: ML conference proceedings conference paper supplement (https://openaccess.thecvf.com/content/CVPR2023/html/Izquierdo_SfM-TTR_Using_Structure_CVPR_2023_paper.html)
Supplement: Supplementary file 1 [file sfm_ttr_supplementary_material.pdf › sfm_ttr_supplementary_material.pdf]

# SfM-TTR: Using Structure from Motion for Test-Time Refinement of Single-View Depth Networks (Supplementary Material)

Sergio Izquierdo      Javier Civera  
I3A, University of Zaragoza, Spain  
{izquierdo, jcivera}@unizar.es

## 1. Results on Sequences without SfM

Tables 1, 2 and 3 show results of the KITTI evaluation considering only sequences with SfM convergence. Specifically, on all sequences from the Eigen test split *except* of:

- 2011\_09\_26\_drive\_0020\_sync,
- 2011\_09\_26\_drive\_0048\_sync,
- 2011\_09\_26\_drive\_0052\_sync,
- 2011\_09\_26\_drive\_0056\_sync, and
- 2011\_10\_03\_drive\_0047\_sync.

## References

- [1] Shariq Farooq Bhat, Ibraheem Alhashim, and Peter Wonka. AdaBins: Depth Estimation using Adaptive Bins. In *Proceedings of the IEEE/CVF Conference on Computer Vision and Pattern Recognition*, pages 4009–4018, 2021. 2
- [2] Jamie Watson, Oisin Mac Aodha, Victor Prisacariu, Gabriel Brostow, and Michael Firman. The temporal opportunist: Self-supervised multi-frame monocular depth. In *Proceedings of the IEEE/CVF Conference on Computer Vision and Pattern Recognition*, pages 1164–1174, 2021. 2
- [3] Jiaying Yan, Hong Zhao, Penghui Bu, and YuSheng Jin. Channel-wise attention-based network for self-supervised monocular depth estimation. In *2021 International Conference on 3D Vision (3DV)*, pages 464–473. IEEE, 2021. 2
- [4] Hang Zhou, David Greenwood, and Sarah Taylor. Self-supervised monocular depth estimation with internal feature fusion. In *British Machine Vision Conference (BMVC)*, 2021. 2

| TTR | Method                         | Abs Rel ↓    | Sq Rel ↓     | RMSE ↓       | RMSE log ↓   | $\delta < 1.25 \uparrow$ | $\delta < 1.25^2 \uparrow$ | $\delta < 1.25^3 \uparrow$ |
|-----|--------------------------------|--------------|--------------|--------------|--------------|--------------------------|----------------------------|----------------------------|
| ✗   | AdaBins [1]                    | 0.075        | 0.345        | 3.238        | 0.114        | 0.937                    | 0.989                      | 0.997                      |
| ✓   | <b>AdaBins [1] + SfM-TTR</b>   | <b>0.061</b> | <b>0.204</b> | <b>2.208</b> | <b>0.091</b> | <b>0.970</b>             | <b>0.993</b>               | <b>0.998</b>               |
| ✗   | ManyDepth [2]                  | 0.060        | 0.326        | 3.096        | 0.099        | 0.955                    | 0.992                      | 0.997                      |
| ✓   | ManyDepth [2] + Ph-TTR         | <b>0.053</b> | <b>0.263</b> | 2.852        | 0.091        | 0.964                    | 0.992                      | <b>0.998</b>               |
| ✓   | <b>ManyDepth [2] + SfM-TTR</b> | 0.054        | 0.270        | <b>2.571</b> | <b>0.090</b> | <b>0.971</b>             | <b>0.993</b>               | 0.997                      |
| ✗   | CADepth [3]                    | 0.079        | 0.413        | 3.489        | 0.120        | 0.931                    | 0.988                      | <b>0.997</b>               |
| ✓   | CADepth [3] + Ph-TTR           | 0.101        | 0.616        | 4.193        | 0.149        | 0.889                    | 0.975                      | 0.994                      |
| ✓   | <b>CADepth [3] + SfM-TTR</b>   | <b>0.067</b> | <b>0.318</b> | <b>2.728</b> | <b>0.106</b> | <b>0.957</b>             | <b>0.989</b>               | 0.996                      |
| ✗   | DIFFNet [4]                    | 0.071        | 0.367        | 3.278        | 0.110        | 0.944                    | 0.990                      | <b>0.997</b>               |
| ✓   | DIFFNet [4] + Ph-TTR           | <b>0.054</b> | 0.292        | 2.927        | 0.093        | 0.962                    | 0.991                      | <b>0.997</b>               |
| ✓   | <b>DIFFNet [4] + SfM-TTR</b>   | 0.055        | <b>0.261</b> | <b>2.514</b> | <b>0.090</b> | <b>0.971</b>             | <b>0.993</b>               | <b>0.997</b>               |

Table 1. **Quantitative results with new KITTI ground truth, Eigen split on sequences with SfM and no cropping.** Best results per model in **bold**, best results across all self-supervised models underlined.

| TTR | Method                         | Abs Rel ↓    | Sq Rel ↓     | RMSE ↓       | RMSE log ↓   | $\delta < 1.25 \uparrow$ | $\delta < 1.25^2 \uparrow$ | $\delta < 1.25^3 \uparrow$ |
|-----|--------------------------------|--------------|--------------|--------------|--------------|--------------------------|----------------------------|----------------------------|
| ✗   | AdaBins [1]                    | 0.060        | 0.204        | 2.429        | 0.091        | 0.961                    | <b>0.995</b>               | <b>0.999</b>               |
| ✓   | <b>AdaBins [1] + SfM-TTR</b>   | <b>0.055</b> | <b>0.149</b> | <b>1.871</b> | <b>0.081</b> | <b>0.976</b>             | 0.994                      | 0.998                      |
| ✗   | ManyDepth [2]                  | 0.057        | 0.289        | 2.967        | 0.093        | 0.959                    | 0.993                      | <b>0.998</b>               |
| ✓   | ManyDepth [2] + Ph-TTR         | 0.051        | 0.237        | 2.742        | 0.087        | 0.968                    | <b>0.994</b>               | <b>0.998</b>               |
| ✓   | <b>ManyDepth [2] + SfM-TTR</b> | <b>0.050</b> | <b>0.235</b> | <b>2.446</b> | <b>0.083</b> | <b>0.974</b>             | <b>0.994</b>               | <b>0.998</b>               |
| ✗   | CADepth [3]                    | 0.073        | 0.368        | 3.333        | 0.113        | 0.938                    | 0.990                      | <b>0.997</b>               |
| ✓   | CADepth [3] + Ph-TTR           | 0.093        | 0.552        | 3.998        | 0.140        | 0.901                    | 0.979                      | 0.995                      |
| ✓   | <b>CADepth [3] + SfM-TTR</b>   | <b>0.058</b> | <b>0.269</b> | <b>2.585</b> | <b>0.095</b> | <b>0.965</b>             | <b>0.992</b>               | <b>0.997</b>               |
| ✗   | DIFFNet [4]                    | 0.066        | 0.325        | 3.122        | 0.103        | 0.950                    | 0.992                      | <b>0.998</b>               |
| ✓   | DIFFNet [4] + Ph-TTR           | 0.052        | 0.264        | 2.812        | 0.089        | 0.965                    | 0.992                      | <b>0.998</b>               |
| ✓   | <b>DIFFNet [4] + SfM-TTR</b>   | <b>0.050</b> | <b>0.218</b> | <b>2.390</b> | <b>0.083</b> | <b>0.974</b>             | <b>0.994</b>               | <b>0.998</b>               |

Table 2. **Quantitative results with new KITTI ground truth, Eigen split on sequences with SfM and Eigen cropping.** Best results per model in **bold**, best results across all self-supervised models underlined.

| TTR | Method                         | Abs Rel ↓    | Sq Rel ↓     | RMSE ↓       | RMSE log ↓   | $\delta < 1.25 \uparrow$ | $\delta < 1.25^2 \uparrow$ | $\delta < 1.25^3 \uparrow$ |
|-----|--------------------------------|--------------|--------------|--------------|--------------|--------------------------|----------------------------|----------------------------|
| ✗   | AdaBins [1]                    | <b>0.086</b> | 0.476        | 3.609        | 0.164        | 0.916                    | <b>0.970</b>               | <b>0.985</b>               |
| ✓   | <b>AdaBins [1] + SfM-TTR</b>   | 0.089        | <b>0.454</b> | <b>3.308</b> | <b>0.163</b> | <b>0.925</b>             | <b>0.970</b>               | 0.984                      |
| ✗   | ManyDepth [2]                  | 0.089        | 0.690        | 4.184        | 0.165        | 0.916                    | 0.968                      | <b>0.984</b>               |
| ✓   | ManyDepth [2] + Ph-TTR         | <b>0.085</b> | <b>0.646</b> | 4.031        | 0.164        | 0.919                    | 0.968                      | <b>0.984</b>               |
| ✓   | <b>ManyDepth [2] + SfM-TTR</b> | 0.086        | 0.708        | <b>3.975</b> | <b>0.162</b> | <b>0.924</b>             | <b>0.969</b>               | <b>0.984</b>               |
| ✗   | CADepth [3]                    | 0.102        | 0.729        | 4.415        | 0.176        | 0.896                    | <b>0.966</b>               | <b>0.984</b>               |
| ✓   | CADepth [3] + Ph-TTR           | 0.120        | 0.916        | 4.944        | 0.195        | 0.857                    | 0.955                      | 0.982                      |
| ✓   | <b>CADepth [3] + SfM-TTR</b>   | <b>0.092</b> | <b>0.693</b> | <b>3.985</b> | <b>0.168</b> | <b>0.915</b>             | <b>0.966</b>               | 0.983                      |
| ✗   | DIFFNet [4]                    | 0.096        | 0.712        | 4.318        | 0.171        | 0.907                    | 0.967                      | <b>0.984</b>               |
| ✓   | DIFFNet [4] + Ph-TTR           | 0.084        | 0.665        | 4.128        | 0.164        | 0.920                    | 0.968                      | <b>0.984</b>               |
| ✓   | <b>DIFFNet [4] + SfM-TTR</b>   | <b>0.083</b> | <b>0.649</b> | <b>3.872</b> | <b>0.160</b> | <b>0.928</b>             | <b>0.970</b>               | <b>0.984</b>               |

Table 3. **Quantitative results with Eigen (old) KITTI ground truth, Eigen split on sequences with SfM and Eigen cropping.** Best results per model in **bold**, best results across all self-supervised models underlined.
